# Supplementary material
Source: PubMed Central journal article supplement (PMC7934323)
Supplement: NEJMc2027040_appendix.pdf [file NEJMc2027040_appendix.pdf]

## Supplementary Appendix

This appendix has been provided by the authors to give readers additional information about their work.

Supplement to: Kim M-C, Cui C, Shin K-R, et al. Duration of culturable SARS-CoV-2 in hospitalized patients with Covid-19. *N Engl J Med*. DOI: 10.1056/NEJMc2027040

# Supplementary Appendix

## Table of Contents

|                                                                                                                                                |    |
|------------------------------------------------------------------------------------------------------------------------------------------------|----|
| <b>Table of Contents</b> .....                                                                                                                 | 1  |
| <b>Detailed Methods</b> .....                                                                                                                  | 3  |
| <b>Study patients and clinical characteristics</b> .....                                                                                       | 3  |
| <b>Collecting serial respiratory samples and testing the samples via real-time reverse transcriptase-polymerase chain reaction assay</b> ..... | 3  |
| <b>Viable SARS-CoV-2 isolation via plaque assay</b> .....                                                                                      | 4  |
| <b>Determination of the duration of SARS-CoV-2 shedding</b> .....                                                                              | 5  |
| <b>Detailed Results</b> .....                                                                                                                  | 7  |
| <b>Study patients and serial respiratory samples</b> .....                                                                                     | 7  |
| <b>Duration of viable virus shedding for SARS-CoV-2</b> .....                                                                                  | 7  |
| <b>Culture positivity rate as a function of the time from symptom onset and cycle-threshold values</b> .....                                   | 8  |
| <b>Analytical sensitivity of real-time reverse transcriptase-polymerase chain reaction assay</b> .....                                         | 8  |
| <b>Analytical sensitivity of plaque assay</b> .....                                                                                            | 9  |
| <b>Supplementary Figures and Tables</b> .....                                                                                                  | 10 |
| <b>Figure S1. Estimates of the time to viral clearance</b> .....                                                                               | 10 |
| <b>Figure S2. Amplification curves for real-time reverse transcriptase-polymerase chain</b>                                                    |    |

|                                                                                                                                                                                                                                                      |    |
|------------------------------------------------------------------------------------------------------------------------------------------------------------------------------------------------------------------------------------------------------|----|
| reaction assay for the N gene of SARS-CoV-2.....                                                                                                                                                                                                     | 11 |
| <b>Figure S3.</b> Plaque assays for detecting the presence of viable SARS-CoV-2 in serially diluted stocks.....                                                                                                                                      | 12 |
| <b>Table S1.</b> Clinical characteristics, disease severity, treatments, and outcomes in 21 patients with COVID-19.....                                                                                                                              | 13 |
| <b>Table S2.</b> Timing of real-time reverse transcriptase-polymerase chain reaction assay and viral culture, presence or absence of viable SARS-CoV-2, kinetics of the viral loads, and clinical course in hospitalized patients with COVID-19..... | 15 |
| <b>Table S3.</b> Culture positivity rates of viable SARS-CoV-2 according to time from symptom onset and cycle-threshold value.....                                                                                                                   | 20 |
| <b>Table S4.</b> The shortest and longest possible time to viral clearance in viral culture and real-time reverse transcriptase-polymerase chain reaction assay.....                                                                                 | 21 |
| <b>Table S5.</b> Cycle-threshold values corresponding to known viral titers of SARS-CoV-2 with serial dilution in real-time reverse transcriptase-polymerase chain reaction assay.....                                                               | 23 |
| <b>References</b> .....                                                                                                                                                                                                                              | 24 |

## **Detailed Methods**

### **Study patients and clinical characteristics**

A consecutive group of all patients with coronavirus disease 2019 (COVID-19) who were hospitalized in Chung-Ang University Hospital, an 850-bed tertiary hospital with National Designated Isolation Unit Wards<sup>1</sup> in Seoul, South Korea between February and June 2020 were enrolled. The diagnosis of COVID-19 was confirmed by real-time reverse transcriptase-polymerase chain reaction (RT-PCR) assay at admission. In South Korea, patients with COVID-19 have been obliged to be isolated in hospitals with negative pressure rooms or in Community Treatment Centers, regardless of the presence or absence of symptoms and severity of the illness.<sup>2,3</sup> In Chung-Ang University Hospital, the patients were isolated until two consecutive negative or inconclusive real-time RT-PCR results were documented at least 24 hours apart.<sup>2,4</sup> The clinical course, including fever ( $\geq 37.5^{\circ}\text{C}$ ) and respiratory manifestations such as sore throat, cough, sputum, dyspnea, and oxygen requirement, were monitored. The study protocol was approved by the Chung-Ang University Hospital Institutional Review Board (No. 2031-002-407).

### **Collecting serial respiratory samples and testing the samples via real-time reverse transcriptase-polymerase chain reaction assay**

Viral loads of the patients were monitored by real-time RT-PCR assays from the date of admission and throughout their hospitalization periods. The plan was to collect samples at approximately 2-day intervals, although this was not always possible. Nasopharyngeal and oropharyngeal swab samples obtained from the patients were collected in 2 mL viral transport media (VTM) together. We adopted cycle-threshold value for the N gene of the severe acute respiratory syndrome coronavirus 2 (SARS-CoV-2) to measure the viral loads in COVID-19

patients.<sup>5</sup> Viral ribonucleic acid (RNA) was extracted using an eMAG™ system (bioMérieux, Inc.), following the manufacturer's instructions.<sup>6</sup> For real-time RT-PCR testing, we used the Allplex™ 2019-nCoV Assay (Seegene, Inc.) which targets the E, RdRP, and N genes of SARS-CoV-2, and the assays were performed using a CFX96 (Bio-Rad Laboratories, Inc.).<sup>6</sup> The results and cycle-threshold values of the real-time RT-PCR tests were determined according to the manufacturer's instructions.<sup>4,6</sup> The remaining VTM were stored at -80°C until virus culture could be performed. To determine the sensitivity of the real-time RT-PCR assay, SARS-CoV-2 of known viral titer was serially diluted in phosphate buffered saline (PBS) to concentrations ranging from 10<sup>6</sup> to 10<sup>-1</sup> plaque forming unit (PFU)/mL. RNA extraction and real-time RT-PCR testing were performed in the same manner as that used for the VTM samples. Amplification curves for the dilutions were constructed by plotting relative fluorescence units against the number of cycles of the reaction. The limit of detection was defined as the lowest concentration of PFU/mL that showed positive results above a set threshold level of the relative fluorescence unit.

### **Viable SARS-CoV-2 isolation via plaque assay**

We conducted SARS-CoV-2 cultures using serial nasopharyngeal and oropharyngeal samples until at least two consecutive no growth were documented. The VTM samples were diluted in PBS supplemented with 3% bovine serum albumin (BSA) and 1% penicillin/streptomycin as needed. A plaque assay was performed to isolate the virus from the samples. Briefly, Vero cells seeded in 6-well plates at  $9 \times 10^5$  cells/well about 24 h earlier were inoculated with diluted samples, incubated for 1 h (37°C, 5% CO<sub>2</sub>) with rocking every 15 min, and overlaid with 2 mL of Dulbecco's Modified Eagle Medium/Nutrient Mixture F-12 (DMEM/F-12) medium containing 0.6% oxoid agar. Plaque formation was determined

after 72 h of incubation. For plaque purification, well-separated plaques were extracted using a pipette and dissolved in 1 mL of PBS with 3% BSA and 1% penicillin/streptomycin. The viruses in the purified plaque were propagated by inoculating Vero cells in a similar manner, but incubation was carried out for 72 h in DMEM containing 2% fetal bovine serum and 1% penicillin/streptomycin. The presence of the targeted virus in the harvested supernatant was confirmed with real-time RT-PCR assay. To determine the sensitivity of the plaque assay using Vero cells for detecting the presence of infectious virions, a SARS-CoV-2 stock of  $1 \times 10^8$  PFU/mL was serially diluted 10-fold to a stock of  $1 \times 10^3$  PFU/mL, and the dilutions were subjected to a plaque assay.

### **Determination of the duration of SARS-CoV-2 shedding**

We compared the time relative to the onset of illness between the viral culture and the real-time RT-PCR assay. The time from symptom onset to viral clearance in viral culture and real-time RT-PCR assay was estimated. We treated the time to viral clearance as interval-censored data and fit a Kaplan–Meier distribution for the data using nonparametric maximum-likelihood estimations, along with 1,000 bootstrap replicates.<sup>7,8</sup> In order to estimate the time to viral clearance in the culture and real-time RT-PCR tests, we identified the shortest and longest possible time to viral clearance in each test in the patients.<sup>9,10</sup> The day of viral clearance in the culture was defined as the first day of two consecutive no growth results, and the day of viral clearance in the real-time RT-PCR assay was defined as the first day of two consecutive negative real-time RT-PCR results. If a positive culture was not documented in a patient, he or she was left censored (censoring when viral clearance in culture had occurred before the time of admission).<sup>9</sup> If real-time RT-PCR clearance had not yet been documented during the hospitalization period, we treated the data as being right censored (censoring when real-time RT-PCR clearance might occur after the time of discharge).<sup>9</sup> We compared the

estimated time from the date of symptom onset to the date of viral clearance between the culture and real-time RT-PCR tests in the 50th percentile of the patients. Data manipulation was conducted using R software (version 4.0.3; R foundation for Statistical Computing).

## **Detailed Results**

### **Study patients and serial respiratory samples**

A total of 21 patients with COVID-19 were consecutively enrolled during the study period. The clinical characteristics, disease severity, treatments, and outcomes of the 21 patients are described in Table S1. A total of 165 samples were tested for real-time RT-PCR assay throughout the hospitalization period. Sampling intervals varied from 1 to 5 days: the median sampling interval was 2 days (interquartile range, 2-3 days). Among them, we performed viral culture in 89 samples. From the 21 patients with COVID-19, viable SARS-CoV-2 was cultured in 29 samples. The timing of real-time RT-PCR and culture tests, whether viable SARS-CoV-2 was isolated or not in the samples, kinetics of the viral loads, and detailed information regarding clinical characteristics over time, including fever and respiratory manifestations, in each patient are specified in Table S2.

### **Duration of viable virus shedding for SARS-CoV-2**

The presence or absence of viable virus according to the time from symptom onset and the cycle-threshold values in the serial respiratory samples are shown in Figure 1. SARS-CoV-2 was cultured so far as 12 days from symptom onset (in Patient 6). Viable virus was grown until 3 days after the resolution of fever ( $\geq 37.5^{\circ}\text{C}$ ) (in Patient 14). Viral culture was positive only in samples with cycle-threshold values  $\leq 28.4$  for the N gene (Table S2 and Table S3). We estimated the time to viral clearance in the culture and real-time RT-PCR tests in the 21 patients. The shortest and longest possible time to viral clearance in viral culture and real-time RT-PCR assay in each patient are summarized in Table S4. The nonparametric maximum-likelihood estimates for the distribution function of patients with SARS-CoV-2 shedding in viral culture and real-time RT-PCR assay are depicted in Figure S1. From the



date of symptom onset, the time to viral clearance in culture was 7 days (95% confidence interval, 5-10 days), compared to 34 days (the lower 95% confidence interval was 24 days, but the upper 95% confidence interval was not computable) in real-time RT-PCR assay in 50% of the patients.

### **Culture positivity rate as a function of the time from symptom onset and cycle-threshold values**

We further dissected culture positivity rates according to the time from symptom onset and cycle-threshold values (Table S3). Culture positivity rates constantly decreased as the time from symptom onset increased: the culture positivity rate was 67% within 4 days, and it subsequently decreased to 40% in 5-8 days, 23% in 9-12 days, and 0% after 13 days of symptoms onset. A gradual decline in culture positivity rates was observed with increasing cycle-threshold values: a viable virus was identified in 100% of the cultures when the cycle-threshold value was  $\leq 22$ , 78% when the cycle-threshold value was  $> 22$  and  $\leq 24$ , 67% when the cycle-threshold value was  $> 24$  and  $\leq 26$ , 46% when the cycle-threshold value was  $> 26$  and  $\leq 28$ , 14% when the cycle-threshold value was  $> 28$  and  $\leq 30$ , and 0% when the cycle-threshold value was  $> 30$ .

### **Analytical sensitivity of real-time reverse transcriptase-polymerase chain reaction assay**

Amplification curves of the real-time RT-PCR assay for the N gene of SARS-CoV-2 of known viral titers that were subjected to 10-fold serial dilutions from  $10^6$  to  $10^{-1}$  PFU/mL are shown in Figure S2. Cycle-threshold values corresponding to the serially diluted SARS-CoV-2 titers are described in Table S5. There was excellent linearity between viral loads and cycle-threshold values, with a coefficient ( $R^2$ ) of 0.9994. The limit of detection was of single ( $10^0$ )

PFU/mL.

### **Analytical sensitivity of plaque assay**

Serially diluted SARS-CoV-2 stocks from  $10^8$  to  $10^{-3}$  PFU/mL were subjected to a plaque assay to assess the assay's sensitivity in detecting the presence of infectious virions (Figure S3). If the plaque assay was reproducible and sensitive, the dilution with a concentration of  $10^0$  PFU/mL should theoretically form a single plaque. In duplicate experiments, viable virus was detected in the dilutions until the concentration of stock reached  $10^0$  PFU/mL.

## Supplementary Figures and Tables

**Figure S1. Estimates of the time to viral clearance.** The nonparametric maximum-likelihood estimation of the proportion of patients with SARS-CoV-2 shedding in 21 patients hospitalized with COVID-19 in viral culture (Panel A) and real-time reverse transcriptase-polymerase chain reaction (RT-PCR) assay (Panel B) are shown. The orange rectangles represent proportions of patients with the corresponding intervals censored for viral clearance. The gray lines represent the 95% confidence interval (CI) of the fitted distributions. The 95% CI of the time to viral clearance (the red point) for the 50th percentile of the patients is indicated by the red horizontal line. From the date of symptom onset, culture clearance occurred by 7 days (95% CI, 5-10 days) and real-time RT-PCR clearance occurred by 34 days (the lower limit of the 95% CI was 24 days, but the upper limit of the 95% CI was not computable) in 50% of the patients.

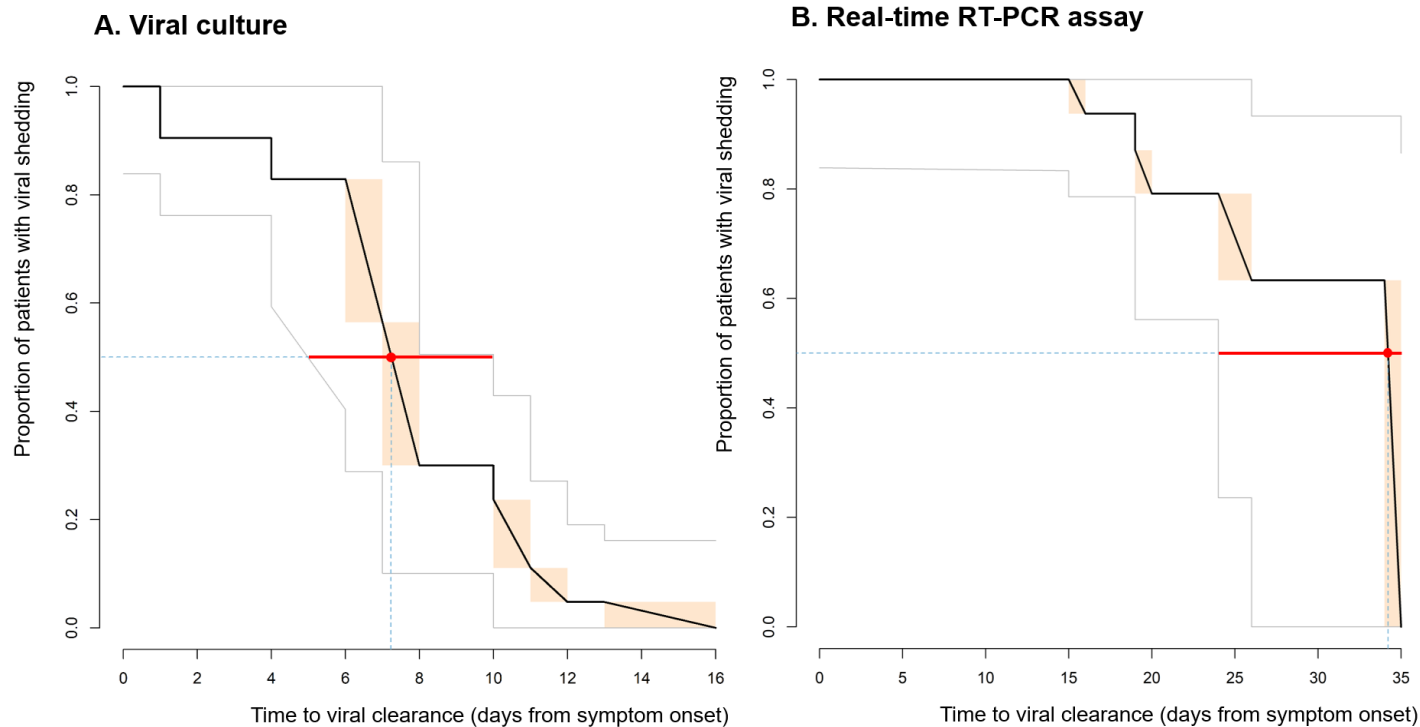

**Figure S2. Amplification curves for real-time reverse transcriptase-polymerase chain reaction assay for the N gene of SARS-CoV-2.** Amplification curves are generated by plotting relative fluorescence units (RFU) against cycle numbers as the reaction progresses. SARS-CoV-2 RNA diluted serially from  $10^6$  to  $10^{-1}$  PFU/mL was tested to determine the cycle-threshold value. The cycle-threshold value for each concentration is determined by the cycle at a RFU threshold value (the horizontal line).

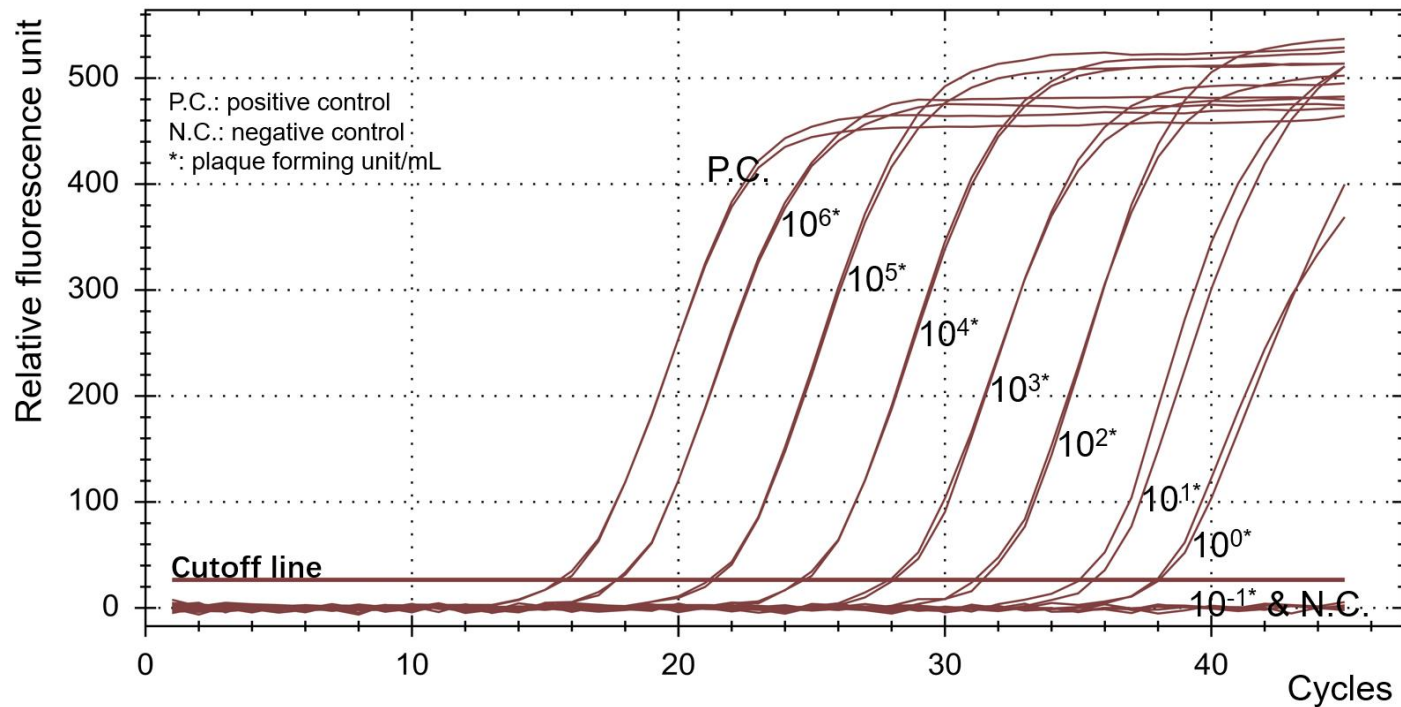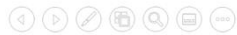

**Figure S3. Plaque assays for detecting the presence of viable SARS-CoV-2 in serially diluted stocks.** SARS-CoV-2 stock of  $1 \times 10^8$  PFU/mL was serially diluted 10-fold to  $1 \times 10^{-3}$  PFU/mL. Plaque assay for the dilutions was performed to detect infectious virions. If the plaque assay was reproducible and sensitive, the dilution with a concentration of  $10^0$  PFU/mL should theoretically form a single plaque. The viable virus was detected in dilutions with a concentration of  $10^0$  PFU/mL or more.

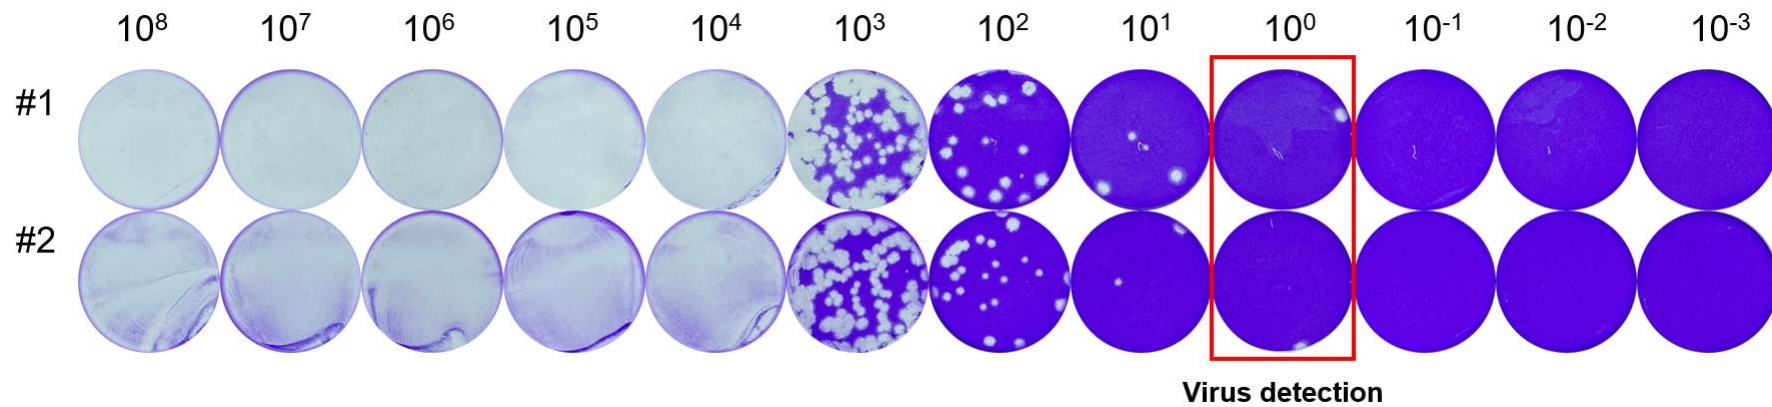

**Table S1. Clinical characteristics, disease severity, treatments, and outcomes in 21 patients with COVID-19**

| <b>Variables</b>                                           |                     |
|------------------------------------------------------------|---------------------|
| Age, median years (IQR)                                    | 62 (40-69)          |
| Male sex                                                   | 16 (76)             |
| Underlying comorbidity                                     |                     |
| Previously healthy                                         | 7 (33)              |
| Hypertension                                               | 10 (48)             |
| Diabetes                                                   | 3 (14)              |
| Chronic lung disease                                       | 2 (10)              |
| Immunocompromised condition                                | 1 <sup>a</sup> (5)  |
| Clinical manifestation                                     |                     |
| Pneumonia <sup>b</sup>                                     | 15 (71)             |
| Upper respiratory infection                                | 5 (24)              |
| Asymptomatic                                               | 1 (5)               |
| Severity of illness at admission                           |                     |
| NEWS2 score, median (IQR)                                  | 1 (0-4)             |
| SOFA score, median (IQR)                                   | 0 (0-2)             |
| APACHE II score, median (IQR)                              | 5 (3-8)             |
| Laboratory findings at admission                           |                     |
| White blood cell, median /mm <sup>3</sup> (IQR)            | 4,400 (3,700-5,500) |
| Hemoglobin, median g/dL (IQR)                              | 14.7 (13.1-15.6)    |
| Platelet × 10 <sup>3</sup> , median /mm <sup>3</sup> (IQR) | 178 (145-262)       |
| Serum creatinine, median mg/dL (IQR)                       | 0.84 (0.77-0.95)    |
| Total bilirubin, median mg/dL (IQR)                        | 0.6 (0.5-0.6)       |
| C-reactive protein, median mg/dL (IQR)                     | 1.0 (0.2-2.4)       |
| Oxygen therapy                                             | 8 (38)              |

|                                                        |           |
|--------------------------------------------------------|-----------|
| Mechanical ventilation                                 | 1 (5)     |
| Antiviral treatment                                    |           |
| Conservative care                                      | 7 (33)    |
| Hydroxychloroquine                                     | 9 (43)    |
| Duration of hydroxychloroquine use, median days (IQR)  | 10 (7-10) |
| Lopinavir/ritonavir                                    | 9 (43)    |
| Duration of lopinavir/ritonavir use, median days (IQR) | 8 (6-10)  |
| Remdesivir                                             | 0         |
| Adjuvant corticosteroid use                            | 0         |
| Convalescent plasma therapy                            | 0         |
| Acute respiratory distress syndrome                    | 1 (5)     |
| Shock                                                  | 1 (5)     |
| In-hospital mortality                                  | 0         |

---

**NOTE.** Data are presented as the number of patients with percentage (%) unless otherwise indicated.

<sup>a</sup> The patient was treated with weekly methotrexate due to rheumatoid arthritis

<sup>b</sup> Pneumonia is defined as the involvement of lung parenchyma on high-resolution computed tomography. All patients underwent high-resolution computed tomography at admission.

**Abbreviations:** APACHE II = Acute Physiology and Chronic Health Evaluation II; COVID-19 = coronavirus disease 2019; IQR = interquartile range; NEWS2 = National Early Warning Score 2; SOFA = Sequential Organ Failure Assessment

**Table S2. Timing of real-time reverse transcriptase-polymerase chain reaction assay and viral culture, presence or absence of viable SARS-CoV-2, kinetics of the viral loads, and clinical course in hospitalized patients with COVID-19**

| Patient        | Age/<br>sex   | Disease                   | Day<br>1 <sup>a</sup> | Day<br>2 | Day<br>3 | Day<br>4    | Day<br>5 | Day<br>6    | Day<br>7 | Day<br>8    | Day<br>9    | Day<br>10 | Day<br>11 | Day<br>12   | Day<br>13 | Day<br>14 | Day<br>15 | Day<br>16 | Day<br>17 | Day<br>18 | Day<br>19 |      |
|----------------|---------------|---------------------------|-----------------------|----------|----------|-------------|----------|-------------|----------|-------------|-------------|-----------|-----------|-------------|-----------|-----------|-----------|-----------|-----------|-----------|-----------|------|
| 1              | 65/<br>male   | Pneumonia                 |                       |          |          |             |          |             |          |             |             |           |           | 29.6<br>Adm |           |           |           | 32.3      |           |           | 32.4      |      |
| 2 <sup>b</sup> | 55/<br>male   | Pneumonia                 |                       |          |          |             |          |             |          | 30.2<br>Adm |             |           |           |             | 34.7      |           |           | 28.4      |           | 39.7      |           |      |
| 3              | 43/<br>female | Pneumonia                 |                       |          |          | 17.2<br>Adm |          |             |          | 28.6        |             |           | 29.7      |             | 37.7      |           | 37.0      |           |           | 39.3      | Dis       |      |
| 4 <sup>c</sup> | 82/<br>female | Pneumonia<br>with ARDS    |                       |          |          |             |          |             |          |             | 31.7<br>Adm |           | 32.0      |             |           | 33.5      |           |           | 39.1      |           |           |      |
| 5              | 35/<br>male   | URI                       |                       |          |          |             |          | 30.0<br>Adm |          |             |             |           |           | 24.2        |           | 26.4      |           | 31.3      |           |           | 37.7      | 30.5 |
| 6              | 91/<br>male   | Pneumonia                 |                       |          |          |             |          |             |          |             |             |           |           | 22.4<br>Adm |           | 27.4      |           |           | 29.9      | 36.6      |           | 30.8 |
| 7              | 85/<br>female | Pneumonia                 |                       |          |          |             |          |             |          | 26.1<br>Adm |             |           |           |             | 33.1      |           | 26.0      |           | 33.7      |           |           | 34.5 |
| 8              | 63/<br>female | Pneumonia                 |                       |          |          |             |          | 24.6<br>Adm |          | 28.6        |             |           | 32.1      |             | 33.3      |           | 28.3      |           |           |           | 40.0      |      |
| 9              | 46/<br>male   | Asymptomatic <sup>d</sup> | 36.9<br>Adm           |          | 39.8     |             |          |             | 38.4     | Dis         |             |           |           |             |           |           |           |           |           |           |           |      |
| 10             | 69/<br>female | Pneumonia                 |                       |          |          |             |          |             |          | 36.6<br>Adm |             | 39.7      |           | 37.6        | Dis       |           |           |           |           |           |           |      |
| 11             | 68/<br>male   | Pneumonia                 |                       |          |          |             |          |             |          | 28.2<br>Adm |             |           | 30.3      |             |           | 33.2      | 40.0      |           |           |           | 35.9      | 40.0 |



| Patient | Age/<br>sex | Disease   | Day<br>1 <sup>a</sup> | Day<br>2    | Day<br>3    | Day<br>4 | Day<br>5    | Day<br>6 | Day<br>7 | Day<br>8 | Day<br>9    | Day<br>10 | Day<br>11 | Day<br>12 | Day<br>13 | Day<br>14 | Day<br>15 | Day<br>16   | Day<br>17 | Day<br>18 | Day<br>19   |
|---------|-------------|-----------|-----------------------|-------------|-------------|----------|-------------|----------|----------|----------|-------------|-----------|-----------|-----------|-----------|-----------|-----------|-------------|-----------|-----------|-------------|
| 12      | 30/<br>male | URI       |                       |             | 22.3<br>Adm | 19.6     |             | 28.2     |          | 31.8     |             | 29.2      | 30.5      |           | 36.5      |           |           | 36.1<br>Dis |           |           |             |
| 13      | 37/<br>male | URI       |                       |             | 22.0<br>Adm | 23.6     |             | 27.0     |          |          | 27.9        | 30.2      | 23.8      |           | 36.0      |           |           | 40.0<br>Dis |           |           |             |
| 14      | 24/<br>male | URI       |                       | 30.8<br>Adm |             | 22.3     |             | 18.9     |          | 17.4     | 20.9        |           | 31.0      |           | 34.9      | 40.0      |           | Dis         |           |           |             |
| 15      | 62/<br>male | URI       |                       |             |             |          | 22.9<br>Adm |          | 26.0     |          | 32.0        |           |           | 32.5      |           | 29.1      |           |             | 33.7      |           | 38.7        |
| 16      | 70/<br>male | Pneumonia |                       | 19.2<br>Adm |             | 23.8     |             |          | 25.9     |          | 37.9        |           | 33.0      |           | 37.2      |           |           | 40.0        |           | 40.0      | Dis         |
| 17      | 62/<br>male | Pneumonia |                       |             | 20.1<br>Adm | 26.6     |             |          | 22.4     |          | 26.9        |           | 28.9      |           | 35.5      |           |           | 40.0        | Dis       |           |             |
| 18      | 32/<br>male | Pneumonia |                       |             | 23.8<br>Adm | 27.0     |             |          | 24.6     |          | 37.2        |           | 30.0      |           | 36.0      |           |           | 40.0        |           | 37.6      | Dis         |
| 19      | 66/<br>male | Pneumonia | 35.2<br>Adm           | 34.9        | 34.7        |          | 35.2        |          | 36.4     |          | 35.8        |           |           | 40.0      |           | 35.6      |           | 40.0        |           |           | 37.9<br>Dis |
| 20      | 60/<br>male | Pneumonia |                       | 18.2<br>Adm | 20.5        | 20.3     |             | 25.4     |          | 28.4     |             | 26.9      |           | 36.2      |           | 37.9      |           | 39.1        |           |           |             |
| 21      | 59/<br>male | Pneumonia |                       |             |             |          |             |          |          |          | 25.5<br>Adm | 29.2      |           | 31.9      |           | 35.5      |           | 39.5        |           |           | 40.0        |

**Continued (patient 1-11)**

| Patient | Day 20 | Day 21      | Day 22 | Day 23 | Day 24 | Day 25 | Day 26 | Day 27 | Day 28 | Day 29 | Day 30 | Day 31 | Day 32 | Day 33 | Day 34 | Day 35 | Day 36 | Day 37 | Day 38 |
|---------|--------|-------------|--------|--------|--------|--------|--------|--------|--------|--------|--------|--------|--------|--------|--------|--------|--------|--------|--------|
| 1       |        | 34.9        |        | 37.3   |        |        | 39.7   | Dis    |        |        |        |        |        |        |        |        |        |        |        |
| 2       | 31.9   |             |        | 34.3   |        |        | 40.0   |        |        |        | 40.0   | Dis    |        |        |        |        |        |        |        |
| 3       |        |             |        |        |        |        |        |        |        |        |        |        |        |        |        |        |        |        |        |
| 4       |        | 39.5        |        | 40.0   |        | 39.1   |        |        | 40.0   |        |        |        | Dis    |        |        |        |        |        |        |
| 5       | 40.0   |             |        | 40.0   | Dis    |        |        |        |        |        |        |        |        |        |        |        |        |        |        |
| 6       |        |             | 35.6   |        | 36.6   |        | 35.8   |        |        | 38.6   |        | 40.0   |        | 37.5   | Dis    |        |        |        |        |
| 7       |        | 35.0        |        | 37.7   |        |        | Dis    |        |        |        |        |        |        |        |        |        |        |        |        |
| 8       |        | 39.4<br>Dis |        |        |        |        |        |        |        |        |        |        |        |        |        |        |        |        |        |
| 9       |        |             |        |        |        |        |        |        |        |        |        |        |        |        |        |        |        |        |        |
| 10      |        |             |        |        |        |        |        |        |        |        |        |        |        |        |        |        |        |        |        |
| 11      | 40.0   | Dis         |        |        |        |        |        |        |        |        |        |        |        |        |        |        |        |        |        |

**Continued (patient 12-21)**

| Patient | Day 20 | Day 21 | Day 22 | Day 23 | Day 24 | Day 25 | Day 26 | Day 27 | Day 28 | Day 29 | Day 30 | Day 31 | Day 32 | Day 33 | Day 34 | Day 35 | Day 36 | Day 37 | Day 38 |
|---------|--------|--------|--------|--------|--------|--------|--------|--------|--------|--------|--------|--------|--------|--------|--------|--------|--------|--------|--------|
| 12      |        |        |        |        |        |        |        |        |        |        |        |        |        |        |        |        |        |        |        |
| 13      |        |        |        |        |        |        |        |        |        |        |        |        |        |        |        |        |        |        |        |
| 14      |        |        |        |        |        |        |        |        |        |        |        |        |        |        |        |        |        |        |        |
| 15      |        | 36.3   |        | 35.2   |        |        | 36.2   |        | 40.0   |        | 34.7   | 40.0   |        | 35.7   |        | 40.0   |        | 40.0   | Dis    |
| 16      |        |        |        |        |        |        |        |        |        |        |        |        |        |        |        |        |        |        |        |
| 17      |        |        |        |        |        |        |        |        |        |        |        |        |        |        |        |        |        |        |        |
| 18      |        |        |        |        |        |        |        |        |        |        |        |        |        |        |        |        |        |        |        |
| 19      |        |        |        |        |        |        |        |        |        |        |        |        |        |        |        |        |        |        |        |
| 20      | 39.2   | Dis    |        |        |        |        |        |        |        |        |        |        |        |        |        |        |        |        |        |
| 21      |        | 40.0   |        | 38.0   | Dis    |        |        |        |        |        |        |        |        |        |        |        |        |        |        |

**NOTE.** Data are the cycle-threshold values for the N gene of SARS-CoV-2 in real-time reverse transcriptase-polymerase chain reaction assay. Viral loads for the patients were monitored from the date of admission and throughout the hospitalization periods.

-  Pink-colored box indicates positive culture of SARS-CoV-2.
-  Blue-colored box indicates negative culture of SARS-CoV-2.
-  White-colored box indicates that the viral culture was not conducted.
-  Red-colored line indicates the period of fever ( $\geq 37.5^{\circ}\text{C}$ ).
-  Yellow-colored line indicates the period of respiratory manifestations such as sore throat, cough, sputum, dyspnea, and oxygen requirement.

<sup>a</sup> Day 1 indicates the date of symptom onset in patients with SARS-CoV-2 infection.

<sup>b</sup> The patient had a medical history of rheumatoid arthritis and was treated with weekly methotrexate.

<sup>c</sup> This patient received mechanical ventilation from day 10 to day 14.

<sup>d</sup> The date of diagnosis was assigned as day 1 in the asymptomatic patient.

**Abbreviations:** Adm = admission; ARDS = acute respiratory distress syndrome; COVID-19 = coronavirus disease 2019; Dis = discharge; URI = upper respiratory infection; SARS-CoV-2 = severe acute respiratory syndrome coronavirus 2

**Table S3. Culture positivity rates of viable SARS-CoV-2 according to time from symptom onset and cycle-threshold value**

| <b>Variables</b>                                          | <b>Number of tested real-time RT-PCR assay</b> | <b>Number of positive viral culture / number of tested viral culture</b> | <b>Culture positivity rates (%)</b> |
|-----------------------------------------------------------|------------------------------------------------|--------------------------------------------------------------------------|-------------------------------------|
| <b>Time from symptom onset</b>                            |                                                |                                                                          |                                     |
| ≤ 4 days                                                  | 21                                             | 14/21                                                                    | 67                                  |
| 5-8 days                                                  | 23                                             | 8/20                                                                     | 40                                  |
| 9-12 days                                                 | 34                                             | 7/31                                                                     | 23                                  |
| 13-16 days                                                | 34                                             | 0/13                                                                     | 0                                   |
| 17-20 days                                                | 22                                             | 0/4                                                                      | 0                                   |
| > 20 days                                                 | 31                                             | 0/0                                                                      | NA                                  |
| <b>Cycle-threshold value for the N gene of SARS-CoV-2</b> |                                                |                                                                          |                                     |
| ≤ 22                                                      | 11                                             | 11/11                                                                    | 100                                 |
| > 22 and ≤ 24                                             | 9                                              | 7/9                                                                      | 78                                  |
| > 24 and ≤ 26                                             | 6                                              | 4/6                                                                      | 67                                  |
| > 26 and ≤ 28                                             | 11                                             | 5/11                                                                     | 46                                  |
| > 28 and ≤ 30                                             | 16                                             | 2/14                                                                     | 14                                  |
| > 30 and ≤ 32                                             | 14                                             | 0/13                                                                     | 0                                   |
| > 32 and ≤ 34                                             | 12                                             | 0/7                                                                      | 0                                   |
| > 34                                                      | 86                                             | 0/18                                                                     | 0                                   |
| Total                                                     | 165                                            | 29/89                                                                    | 33                                  |

**Abbreviations:** RT-PCR = reverse transcriptase-polymerase chain reaction; SARS-CoV-2 = severe acute respiratory syndrome coronavirus 2

**Table S4. The shortest and longest possible time to viral clearance in viral culture and real-time reverse transcriptase-polymerase chain reaction assay**

| <b>Patient</b> | <b>C<sub>L</sub></b> | <b>C<sub>R</sub></b> | <b>P<sub>L</sub></b> | <b>P<sub>R</sub></b> |
|----------------|----------------------|----------------------|----------------------|----------------------|
| 1              | 1                    | 12                   | 27                   | NA                   |
| 2              | 1                    | 8                    | 24                   | 26                   |
| 3              | 5                    | 8                    | 19                   | NA                   |
| 4              | 1                    | 9                    | 26                   | NA                   |
| 5              | 10                   | 11                   | 19                   | 20                   |
| 6              | 13                   | 16                   | 34                   | NA                   |
| 7              | 9                    | 12                   | 24                   | NA                   |
| 8              | 7                    | 8                    | 22                   | NA                   |
| 9              | 1                    | 1                    | 8                    | NA                   |
| 10             | 1                    | 8                    | 13                   | NA                   |
| 11             | 1                    | 8                    | 19                   | 19                   |
| 12             | 7                    | 8                    | 17                   | NA                   |
| 13             | 7                    | 9                    | 14                   | NA                   |
| 14             | 10                   | 11                   | 15                   | NA                   |
| 15             | 6                    | 7                    | 34                   | 35                   |
| 16             | 5                    | 7                    | 14                   | 16                   |
| 17             | 5                    | 7                    | 14                   | NA                   |
| 18             | 4                    | 4                    | 19                   | NA                   |
| 19             | 1                    | 1                    | 20                   | NA                   |
| 20             | 11                   | 13                   | 21                   | NA                   |
| 21             | 10                   | 10                   | 24                   | NA                   |

**NOTE.**  $C_L$  and  $C_R$  represent the shortest and longest possible time (days) to viral clearance from symptom onset in viral culture.  $P_L$  and  $P_R$  represent the shortest and longest possible time (days) to viral clearance from symptom onset in real-time reverse transcriptase-polymerase chain reaction (RT-PCR) assay. The date of viral clearance in viral culture and real-time RT-PCR assay was defined as the first day of two consecutive negative results of each test. When viral clearance in real-time RT-PCR assay was not observed due to discharge, the latest limit is indicated as “NA”.

**Abbreviations:** NA = not available; RT-PCR = reverse transcriptase-polymerase chain reaction

**Table S5. Cycle-threshold values corresponding to known viral titers of SARS-CoV-2 with serial dilution in real-time reverse transcriptase-polymerase chain reaction assay**

| <b>Virus titer<br/>(log<sub>10</sub> PFU/mL)</b> | <b>Cycle-threshold value<sup>a</sup><br/>for the N gene</b> |
|--------------------------------------------------|-------------------------------------------------------------|
| -1                                               | Not determined                                              |
| 0 <sup>b</sup>                                   | 38.5                                                        |
| 1                                                | 35.3                                                        |
| 2                                                | 31.3                                                        |
| 3                                                | 28.0                                                        |
| 4                                                | 24.6                                                        |
| 5                                                | 21.2                                                        |
| 6                                                | 17.7                                                        |

<sup>a</sup> The Allplex™ 2019-nCoV Assay (Seegene, Inc.) was used for the real-time reverse transcriptase-polymerase chain reaction assay.

<sup>b</sup> Limit of detection of the real-time reverse transcriptase-polymerase chain reaction assay was 10<sup>0</sup> PFU/mL.

**Abbreviations:** PFU = plaque forming unit; SARS-CoV-2 = severe acute respiratory syndrome coronavirus 2



## **References**

- 1.** The Facility Guidelines on National Designated Isolation Unit Wards. 17 January 2020. ([https://www.cdc.go.kr/board/board.es?mid=a20507020000&bid=0019&act=view&list\\_no=365783&tag=&nPage=1.](https://www.cdc.go.kr/board/board.es?mid=a20507020000&bid=0019&act=view&list_no=365783&tag=&nPage=1.))
- 2.** Response guidelines to prevent the spread of COVID-19. 8-1 ed: Korea Disease Control and Prevention Agency; 20 May, 2020. (In Korean) ([http://ncov.mohw.go.kr/board/doFileDownload.do?file\\_name=%E2%98%85%EC%BD%94%EB%A1%9C%EB%82%98%EB%B0%94%EC%9D%B4%EB%9F%AC%EC%8A%A4%EA%B0%90%EC%97%BC%EC%A6%9D-19%20%EB%8C%80%EC%9D%91%20%EC%A7%80%EC%B9%A8%20\(%EC%A7%80%EC%9E%90%EC%B2%B4%EC%9A%A9\)%E3%80%8D\(8-1%ED%8C%90\)\\_1.pdf&file\\_path=/upload/ncov/file/202006/1590974972535\\_20200601102937.pdf&seq=4306](http://ncov.mohw.go.kr/board/doFileDownload.do?file_name=%E2%98%85%EC%BD%94%EB%A1%9C%EB%82%98%EB%B0%94%EC%9D%B4%EB%9F%AC%EC%8A%A4%EA%B0%90%EC%97%BC%EC%A6%9D-19%20%EB%8C%80%EC%9D%91%20%EC%A7%80%EC%B9%A8%20(%EC%A7%80%EC%9E%90%EC%B2%B4%EC%9A%A9)%E3%80%8D(8-1%ED%8C%90)_1.pdf&file_path=/upload/ncov/file/202006/1590974972535_20200601102937.pdf&seq=4306)).
- 3.** Kang E, Lee SY, Jung H, Kim MS, Cho B, Kim YS. Operating Protocols of a Community Treatment Center for Isolation of Patients with Coronavirus Disease, South Korea. *Emerg Infect Dis* 2020;26.
- 4.** Hong KH, Lee SW, Kim TS, et al. Guidelines for Laboratory Diagnosis of Coronavirus Disease 2019 (COVID-19) in Korea. *Ann Lab Med* 2020;40:351-60.
- 5.** He X, Lau EHY, Wu P, et al. Temporal dynamics in viral shedding and transmissibility of COVID-19. *Nat Med* 2020;26:672-5.
- 6.** Allplex 2019-nCoV assay: instructions for use. Seoul, South Korea: Seegene, 2020. (Cat. no. RP10250X/RP10252W.)
- 7.** Reich NG, Lessler J, Cummings DA, Brookmeyer R. Estimating incubation period distributions with coarse data. *Stat Med* 2009;28:2769-84.
- 8.** Dugue AE, Pulido M, Chabaud S, Belin L, Gal J. How to Deal with Interval-Censored Data Practically while Assessing the Progression-Free Survival: A Step-by-Step Guide Using SAS and R Software. *Clin Cancer Res* 2016;22:5629-35.
- 9.** Lessler J, Reich NG, Cummings DA, et al. Outbreak of 2009 pandemic influenza A (H1N1) at a New York City school. *N Engl J Med* 2009;361:2628-36.
- 10.** Assiri A, McGeer A, Perl TM, et al. Hospital outbreak of Middle East respiratory syndrome coronavirus. *N Engl J Med* 2013;369:407-16.
